# Supplementary material for: MiR-1303 Regulates Mycobacteria Induced Autophagy by Targeting Atg2B
Source: PubMed Central journal article supplement (PMC4714759; doi:10.1371/journal.pone.0146770), 2016-01-15

S2 Fig.

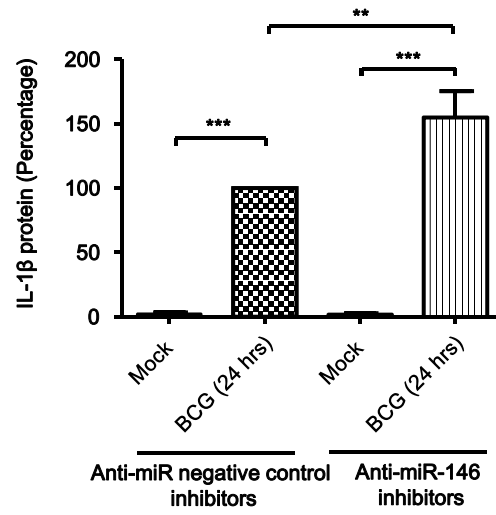

Supplement: pone.0146770.s002.pdf [file pone.0146770.s002.pdf]
